# Supplementary material for: Theory on the Coupled Stochastic Dynamics of Transcription and Splice-Site Recognition
Source: PLOS journal article supplement (doi:10.1371/journal.pcbi.1002747), 2012-11-01
Supplement: S4 (10.1371/journal.pcbi.1002747.s004) [file journal.pcbi.1002747.s004]

# Figure S4

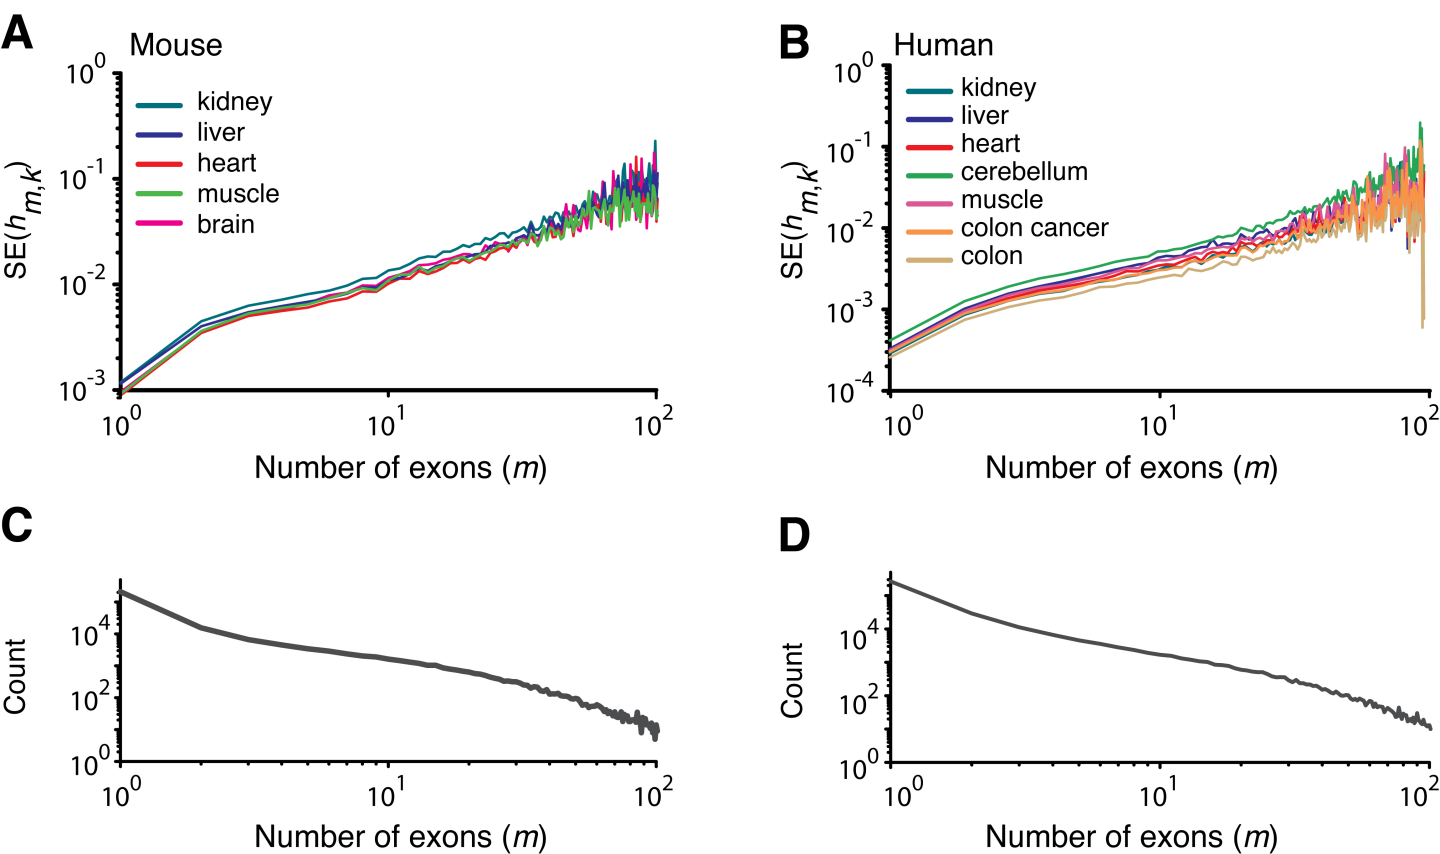

This figure provides complementary data to Figure 6.

A-B. Standard error of  $h_{m,k}$  for mouse (A) and human (B).

C-D. Number of transcripts (count) with a given number of exons in mouse (C) and human (D).
